# Supplementary figures and images for: The impact of provider-initiated (opt-out) HIV testing and counseling of patients with sexually transmitted infection in Cape Town, South Africa: a controlled trial
Source: Springer Nature journal article supplement (doi:10.1186/1748-5908-5-8), 2010-01-30

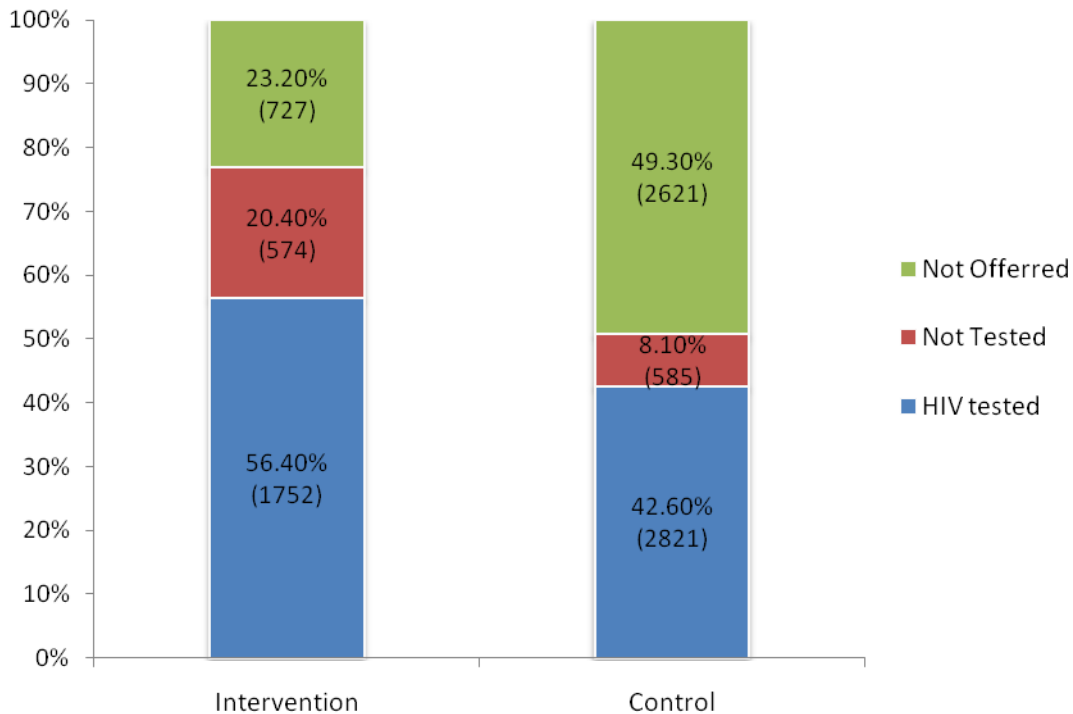

Supplement: 13012_2009_222_MOESM2_ESM.pdf [file 13012_2009_222_MOESM2_ESM.pdf]
